# Supplementary material for: Assessing the Utility of ColabFold and AlphaMissense in Determining Missense Variant Pathogenicity for Congenital Myasthenic Syndromes
Source: Preprints.org preprint supplement (doi:10.20944/preprints202410.0347.v1), 2024-10-04
Supplement: Supplementary file 1 [file supplementary]

## Sheet: Sheet1
Pathogenic CHRNA	RMSD with AF-WT	10aa (Upstream/Downstream) LDD Score	5A LDD Score	Average plDDT 10 residues up/downstream WT	Average plDDT 10 residues up/downstream Mutated	Mutation Effect on Average plDDT 10 residues up/downstream	% Change in Average pLDDT (10aa up/downstream)	Average plDDT of residues within 5A 3D vicinity WT	Average plDDT of residues within 5A 3D vicinity Mutated	Mutation Effect Average plDDT of residues within 5A 3D vicinity	% Change in Average pLDDT (5A 3D vicinity)	Wild-Type Global Average plDDT	Mutated Global Average plDDT	Mutation Effect on Global Average plDDT	% Change in Global Average plDDT Between WT and Mutated	Wild-Type pTM	Mutated pTM	Mutation Effect on pTM	% Change in pTM Between WT and Mutated
Deficiency
R75H	0.567	0.345	0.238	93.199	93.585	0.386	0.414168	91.6587	92.0375	0.37875	0.413218	80.1	80.6	0.5	0.62422	0.632	0.638	0.006	0.949367
E418G	0.33	0.309	0.313	83.956	83.361	-0.595	-0.708705	83.8662	83.1488	-0.7175	-0.855529	80.1	80.2	0.1	0.124844	0.632	0.638	0.006	0.949367
R40W	0.472	0.491	0.467	89.035	85.039	-3.996	-4.48812	91.045	87.185	-3.86	-4.23966	80.1	80.2	0.1	0.124844	0.632	0.637	0.005	0.791139
L187P	0.376	0.427	0.571	91.314	87.488	-3.826	-4.18994	92.049	87.03	-5.019	-5.45253	80.1	80.3	0.2	0.249688	0.632	0.636	0.004	0.632911
R229C	0.768	0.845	1.043	89.988	89.015	-0.973	-1.08126	87.546	85.849	-1.697	-1.93841	80.1	79.9	-0.2	-0.249688	0.632	0.63	-0.002	-0.316456
M263T	0.246	0.218	0.157	85.435	84.464	-0.971	-1.13654	87.026	86.28	-0.746	-0.857215	80.1	80.1	0	0	0.632	0.635	0.003	0.474684
SCS
T301S	0.433	0.345	0.333	84.484	84.854	0.37	0.437953	84.408	84.72	0.312	0.369633	80.1	80.4	0.3	0.374532	0.632	0.635	0.003	0.474684
G173S	0.829	0.536	0.638	89.832	91.817	1.985	2.20968	89.848	92.383	2.535	2.82143	80.1	80.4	0.3	0.374532	0.632	0.653	0.021	3.32278
S246F	0.751	1.173	1.175	86.371	86.667	0.296	0.342708	86.158	86.681	0.523	0.607024	80.1	80.5	0.4	0.499376	0.632	0.657	0.025	3.9557
T274I	0.414	0.536	0.55	87.086	88.072	0.986	1.13221	87.408	88.419	1.011	1.15664	80.1	80	-0.1	-0.124844	0.632	0.634	0.002	0.316456
N237K	0.21	0.418	0.343	76.966	79.259	2.293	2.97924	85.903	85.86	-0.043	-0.0500565	80.1	80.6	0.5	0.62422	0.632	0.639	0.007	1.10759
S289I	0.162	0.218	0.35	71.675	72.892	1.217	1.69794	65.35	67.005	1.655	2.53252	80.1	79.9	-0.2	-0.249688	0.632	0.63	-0.002	-0.316456
V176M	0.425	0.364	0.488	91.354	90.99	-0.364	-0.39845	91.104	90.601	-0.503	-0.552116	80.1	80.8	0.7	0.873908	0.632	0.639	0.007	1.10759
FCS
F276L	0.973	1.582	1.625	85.769	88.286	2.517	2.93463	86.41	88.829	2.419	2.79944	80.1	80.3	0.2	0.249688	0.632	0.655	0.023	3.63924
V152I	0.176	0.164	0.2	84.475	85.534	1.059	1.25363	83.007	84.214	1.207	1.45409	80.1	80.2	0.1	0.124844	0.632	0.635	0.003	0.474684
Pathogenic CHRNB	RMSD with AF-WT	10aa (Upstream/Downstream) LDD Score	5A LDD Score	Average plDDT 10 residues up/downstream WT	Average plDDT 10 residues up/downstream Mutated	Mutation Effect on Average plDDT 10 residues up/downstream	% Change in Average pLDDT (10aa up/downstream)	Average plDDT of residues within 5A 3D vicinity WT	Average plDDT of residues within 5A 3D vicinity Mutated	Mutation Effect Average plDDT of residues within 5A 3D vicinity	% Change in Average pLDDT (5A 3D vicinity)	Wild-Type Global Average plDDT	Global Average plDDT	Mutation Effect on Global Average plDDT	% Change in Global Average plDDT Between WT and Mutated	Wild-Type pTM	Mutated pTM	Mutation Effect on pTM	% Change in pTM Between WT and Mutated
Deficiency
C151R	1.352	1.664	1.6	91.325	85.948	-5.377	-5.88776	92.763	86.602	-6.161	-6.64166	77.3	76	-1.3	-1.68176	0.685	0.658	-0.027	-3.94161
R243C	0.646	0.591	0.763	92.531	90.637	-1.894	-2.04688	91.83	88.91	-2.92	-3.17979	77.3	76	-1.3	-1.68176	0.685	0.67	-0.015	-2.18978
SCS
V289M	0.145	0.145	0.138	90.893	91.001	0.108	0.118821	91.375	91.538	0.163	0.178386	77.3	77.6	0.3	0.388098	0.685	0.69	0.005	0.729927
V319A	1.283	0.582	0.522	91.635	88.597	-3.038	-3.31533	91.507	88.521	-2.986	-3.26314	77.3	77.4	0.1	0.129366	0.685	0.677	-0.008	-1.16788
Pathogenic CHRND	RMSD with AF-WT	10aa (Upstream/Downstream) LDD Score	5A LDD Score	Average plDDT 10 residues up/downstream WT	Average plDDT 10 residues up/downstream Mutated	Mutation Effect on Average plDDT 10 residues up/downstream	% Change in Average pLDDT (10aa up/downstream)	Average plDDT of residues within 5A 3D vicinity WT	Average plDDT of residues within 5A 3D vicinity Mutated	Mutation Effect Average plDDT of residues within 5A 3D vicinity	% Change in Average pLDDT (5A 3D vicinity)	Wild-Type Global Average plDDT	Global Average plDDT	Mutation Effect on Global Average plDDT	% Change in Global Average plDDT Between WT and Mutated	Wild-Type pTM	Mutated pTM	Mutation Effect on pTM	% Change in pTM Between WT and Mutated
Deficiency
P271Q	0.17	0.2	0.233	83.713	82.058	-1.655	-1.97699	82.543	80.175	-2.368	-2.86881	80.2	80.2	0	0	0.631	0.631	0	0
N76D	0.16	0.109	0.1	92.37	92.331	-0.039	-0.0422215	91.01	90.95	-0.06	-0.0659268	80.2	79.7	-0.5	-0.623441	0.631	0.632	0.001	0.158479
R336Q	0.241	0.527	0.457	79.442	76.26	-3.182	-4.00544	81.47	78.519	-2.951	-3.62219	80.2	79.5	-0.7	-0.872818	0.631	0.628	-0.003	-0.475436
SCS
S289F	0.139	0.164	0.178	87.378	87.485	0.107	0.122456	87.491	87.51	0.019	0.0217165	80.2	80.1	-0.1	-0.124688	0.631	0.63	-0.001	-0.158479
FCS
E80K	0.173	0.1	0.086	93.131	92.851	-0.28	-0.300652	93.16	92.836	-0.324	-0.347789	80.2	79.7	-0.5	-0.623441	0.631	0.63	-0.001	-0.158479
Pathogenic CHRNE	RMSD with AF-WT	10aa (Upstream/Downstream) LDD Score	5A LDD Score	Average plDDT 10 residues up/downstream WT	Average plDDT 10 residues up/downstream Mutated	Mutation Effect on Average plDDT 10 residues up/downstream	% Change in Average pLDDT (10aa up/downstream)	Average plDDT of residues within 5A 3D vicinity WT	Average plDDT of residues within 5A 3D vicinity Mutated	Mutation Effect Average plDDT of residues within 5A 3D vicinity	% Change in Average pLDDT (5A 3D vicinity)	Wild-Type Global Average plDDT	Global Average plDDT	Mutation Effect on Global Average plDDT	% Change in Global Average plDDT Between WT and Mutated	Wild-Type pTM	Mutated pTM	Mutation Effect on pTM	% Change in pTM Between WT and Mutated
Deficiency
Y35H	0.436	0.473	0.54	89.5836	87.0918	-2.4918	-2.78154	90.68	85.89	-4.79	-5.28231	77.4	76.9	-0.5	-0.645995	0.659	0.634	-0.025	-3.79363
C148S	0.233	0.327	0.35	89.959	88.271	-1.688	-1.87641	92.133	90.343	-1.79	-1.94284	77.4	76.5	-0.9	-1.16279	0.659	0.629	-0.03	-4.55235
S163L	0.239	0.182	0.243	92.114	90.573	-1.541	-1.67293	93.089	91.089	-2	-2.14848	77.4	76.6	-0.8	-1.03359	0.659	0.635	-0.024	-3.64188
P351L	1.312	3.345	3.5	57.74	58.618	0.878	1.52061	56.994	58.03	1.036	1.81774	77.4	77	-0.4	-0.516796	0.659	0.605	-0.054	-8.19423
P265L	1.555	4.455	4.683	68.296	69.401	1.105	1.61796	67.602	68.848	1.246	1.84314	77.4	76.3	-1.1	-1.42119	0.659	0.603	-0.056	-8.49772
P302R	0.233	1.036	0.933	77.278	65.335	-11.943	-15.4546	81.989	70.278	-11.711	-14.2836	77.4	76.8	-0.6	-0.775194	0.659	0.635	-0.024	-3.64188
P351R	0.356	2.318	2.575	57.54	57.425	-0.115	-0.199861	56.994	57.211	0.217	0.380742	77.4	77.6	0.2	0.258398	0.659	0.639	-0.02	-3.0349
E24K	1.414	1.073	0.914	80.986	76.478	-4.508	-5.56639	87.851	85.797	-2.054	-2.33805	77.4	76.8	-0.6	-0.775194	0.659	0.606	-0.053	-8.04249
L98P	1.325	0.455	0.36	90.73	88.215	-2.515	-2.77196	92.49	90	-2.49	-2.69218	77.4	77	-0.4	-0.516796	0.659	0.608	-0.051	-7.739
R331Q	0.184	0.227	0.186	68.7	66.21	-2.49	-3.62445	70.383	68.153	-2.23	-3.16838	77.4	77.6	0.2	0.258398	0.659	0.64	-0.019	-2.88316
T179P	0.245	1.182	0.617	88.928	85.23	-3.698	-4.15842	93.345	90.05	-3.295	-3.52992	77.4	77.2	-0.2	-0.258398	0.659	0.638	-0.021	-3.18665
N327K	0.283	0.309	0.338	74.377	73.39	-0.987	-1.32702	75.761	75.186	-0.575	-0.758966	77.4	77.6	0.2	0.258398	0.659	0.642	-0.017	-2.57967
SCS
L241F	1.311	1.727	1.95	89.636	88.476	-1.16	-1.29412	89.025	88.023	-1.002	-1.12553	77.4	76.5	-0.9	-1.16279	0.659	0.633	-0.026	-3.94537
L289F	0.256	0.436	0.438	83.615	83.93	0.315	0.376727	84.761	84.974	0.213	0.251295	77.4	77.2	-0.2	-0.258398	0.659	0.637	-0.022	-3.33839
T284P	0.318	0.709	0.813	85.392	83.399	-1.993	-2.33394	85.389	83.183	-2.206	-2.58347	77.4	76.1	-1.3	-1.67959	0.659	0.625	-0.034	-5.15933
S255A	1.495	2.491	2.61	83.95	84.497	0.547	0.651578	84.066	84.551	0.485	0.576928	77.4	77.3	-0.1	-0.129199	0.659	0.606	-0.053	-8.04249
FCS
P141L	1.376	0.918	0.983	93.551	90.597	-2.954	-3.15764	93.092	89.408	-3.684	-3.95738	77.4	76.7	-0.7	-0.904393	0.659	0.604	-0.055	-8.34598
T58K	1.076	0.2	0.229	92.656	91.821	-0.835	-0.901183	89.487	87.961	-1.526	-1.70528	77.4	76.3	-1.1	-1.42119	0.659	0.629	-0.03	-4.55235
Non-Pathogenic CHRNA	RMSD with AF-WT	10aa (Upstream/Downstream) LDD Score	5A LDD Score	Average plDDT 10 residues up/downstream WT	Average plDDT 10 residues up/downstream Mutated	Mutation Effect on Average plDDT 10 residues up/downstream	% Change in Average pLDDT (10aa up/downstream)	Average plDDT of residues within 5A 3D vicinity WT	Average plDDT of residues within 5A 3D vicinity Mutated	Mutation Effect Average plDDT of residues within 5A 3D vicinity	% Change in Average pLDDT (5A 3D vicinity)	Wild-Type Global Average plDDT	Global Average plDDT	Mutation Effect on Global Average plDDT	% Change in Global Average plDDT Between WT and Mutated	Wild Type pTM	Mutated pTM	Mutation Effect on pTM	% Change in pTM Between WT and Mutated
L271R	0.302	0.664	0.688	88.102	88.995	0.893	1.0136	88.35	89.228	0.878	0.993775	80.1	80.3	0.2	0.249688	0.632	0.635	0.003	0.474684
Q228H	0.425	0.455	0.563	90.878	91.082	0.204	0.224477	89.868	90.153	0.285	0.317132	80.1	80.1	0	0	0.632	0.634	0.002	0.316456
Non-Pathogenic CHRNB	RMSD with AF-WT	10aa (Upstream/Downstream) LDD Score	5A LDD Score	Average plDDT 10 residues up/downstream WT	Average plDDT 10 residues up/downstream Mutated	Mutation Effect on Average plDDT 10 residues up/downstream	% Change in Average pLDDT (10aa up/downstream)	Average plDDT of residues within 5A 3D vicinity WT	Average plDDT of residues within 5A 3D vicinity Mutated	Mutation Effect Average plDDT of residues within 5A 3D vicinity	% Change in Average pLDDT (5A 3D vicinity)	Wild-Type Global Average plDDT	Global Average plDDT	Mutation Effect on Global Average plDDT	% Change in Global Average plDDT Between WT and Mutated	Wild-Type pTM	Mutated pTM	Mutation Effect on pTM	% Change in pTM Between WT and Mutated
Non-Pathogenic CHRND	RMSD with AF-WT	10aa (Upstream/Downstream) LDD Score	5A LDD Score	Average plDDT 10 residues up/downstream WT	Average plDDT 10 residues up/downstream Mutated	Mutation Effect on Average plDDT 10 residues up/downstream	% Change in Average pLDDT (10aa up/downstream)	Average plDDT of residues within 5A 3D vicinity WT	Average plDDT of residues within 5A 3D vicinity Mutated	Mutation Effect Average plDDT of residues within 5A 3D vicinity	% Change in Average pLDDT (5A 3D vicinity)	Wild-Type Global Average plDDT	Global Average plDDT	Mutation Effect on Global Average plDDT	% Change in Global Average plDDT Between WT and Mutated	Wild-Type pTM	Mutated pTM	Mutation Effect on pTM	% Change in pTM Between WT and Mutated
D440V	0.31	1.927	1.95	87.489	86.263	-1.226	-1.40132	87.301	85.955	-1.346	-1.54179	80.2	79.9	-0.3	-0.374065	0.631	0.632	0.001	0.158479
E24K	0.224	0.555	0.2	73.688	75.381	1.693	2.29752	84.241	83.486	-0.755	-0.896238	80.2	79.6	-0.6	-0.74813	0.631	0.625	-0.006	-0.950872
L331F	0.15	0.264	0.256	86.304	84.51	-1.794	-2.0787	86.534	84.619	-1.915	-2.213	80.2	79.7	-0.5	-0.623441	0.631	0.629	-0.002	-0.316957
P307S	0.281	0.445	0.425	79.685	79.232	-0.453	-0.568488	82.283	82.143	-0.14	-0.170145	80.2	79.5	-0.7	-0.872818	0.631	0.63	-0.001	-0.158479
R243L	0.309	0.245	0.313	91.789	91.602	-0.187	-0.203728	91.616	91.276	-0.34	-0.371114	80.2	80	-0.2	-0.249377	0.631	0.631	0	0
S166F	0.316	0.355	0.433	92.081	92.251	0.17	0.18462	93.064	93.299	0.235	0.252514	80.2	80	-0.2	-0.249377	0.631	0.634	0.003	0.475436
T72N	0.146	0.1	0.122	90.529	90.332	-0.197	-0.21761	90.332	90.09	-0.242	-0.267901	80.2	80.1	-0.1	-0.124688	0.631	0.632	0.001	0.158479
V439M	0.206	1.636	1.633	86.285	85.419	-0.866	-1.00365	86.573	85.533	-1.04	-1.2013	80.2	80.2	0	0	0.631	0.631	0	0
Non-Pathogenic CHRNE	RMSD with AF-WT	10aa (Upstream/Downstream) LDD Score	5A LDD Score	Average plDDT 10 residues up/downstream WT	Average plDDT 10 residues up/downstream Mutated	Mutation Effect on Average plDDT 10 residues up/downstream	% Change in Average pLDDT (10aa up/downstream)	Average plDDT of residues within 5A 3D vicinity WT	Average plDDT of residues within 5A 3D vicinity Mutated	Mutation Effect Average plDDT of residues within 5A 3D vicinity	% Change in Average pLDDT (5A 3D vicinity)	Wild-Type Global Average plDDT	Global Average plDDT	Mutation Effect on Global Average plDDT	% Change in Global Average plDDT Between WT and Mutated	Wild-Type pTM	Mutated pTM	Mutation Effect on pTM	% Change in pTM Between WT and Mutated
V325L	0.289	0.427	0.41	77.076	76.91	-0.166	-0.215372	77.339	77.145	-0.194	-0.250844	77.4	77.6	0.2	0.258398	0.659	0.641	-0.018	-2.73141
Q169L	0.307	0.155	0.129	90.229	90.492	0.263	0.291481	89.763	90.04	0.277	0.30859	77.4	77.5	0.1	0.129199	0.659	0.644	-0.015	-2.27618
G224D	1.711	2.382	2.675	71.203	63.623	-7.58	-10.6456	64.73	57.878	-6.852	-10.5855	77.4	77	-0.4	-0.516796	0.659	0.604	-0.055	-8.34598
C273S	0.245	0.455	0.513	74.146	73.223	-0.923	-1.24484	76.528	75.438	-1.09	-1.42432	77.4	77.4	0	0	0.659	0.636	-0.023	-3.49014
V301M	0.306	0.191	0.2	76.319	76.877	0.558	0.731142	79.008	78.858	-0.15	-0.189854	77.4	77.5	0.1	0.129199	0.659	0.639	-0.02	-3.0349
S276F	0.871	1.145	1.133	80.712	82.056	1.344	1.66518	80.837	82.106	1.269	1.56983	77.4	76.5	-0.9	-1.16279	0.659	0.629	-0.03	-4.55235
A431P	0.233	0.573	0.522	88.81	83.168	-5.642	-6.35289	89.279	83.48	-5.799	-6.49537	77.4	77.2	-0.2	-0.258398	0.659	0.636	-0.023	-3.49014
R237L	1.642	1.418	1.513	91.277	87.264	-4.013	-4.39651	89.726	84.605	-5.121	-5.70738	77.4	76.2	-1.2	-1.55039	0.659	0.6	-0.059	-8.95296
I194T	0.504	0.445	0.343	83.71	81.731	-1.979	-2.36411	87.114	84.696	-2.418	-2.77567	77.4	76.7	-0.7	-0.904393	0.659	0.634	-0.025	-3.79363
